# Supplementary material for: Podoplanin is indispensable for cell motility and platelet-induced epithelial-to-mesenchymal transition-related gene expression in esophagus squamous carcinoma TE11A cells
Source: PubMed Central journal article supplement (PMC7310449; doi:10.1186/s12935-020-01328-2), 2020-06-23

# Effect of EGTA on PLT- or TGF- $\beta$ -induced expression of vimentin in TE11A cells

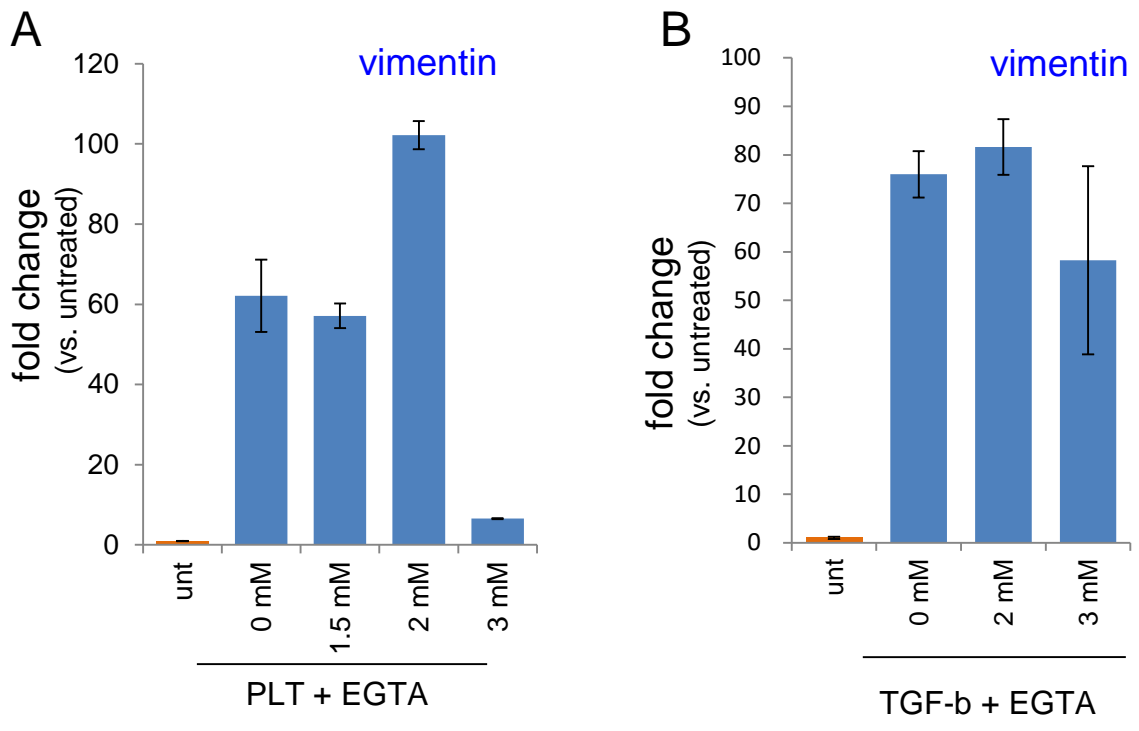

Effect of SB431542 on PLT-or TGF- $\beta$ -induced expression of EMT genes in TE11A cells

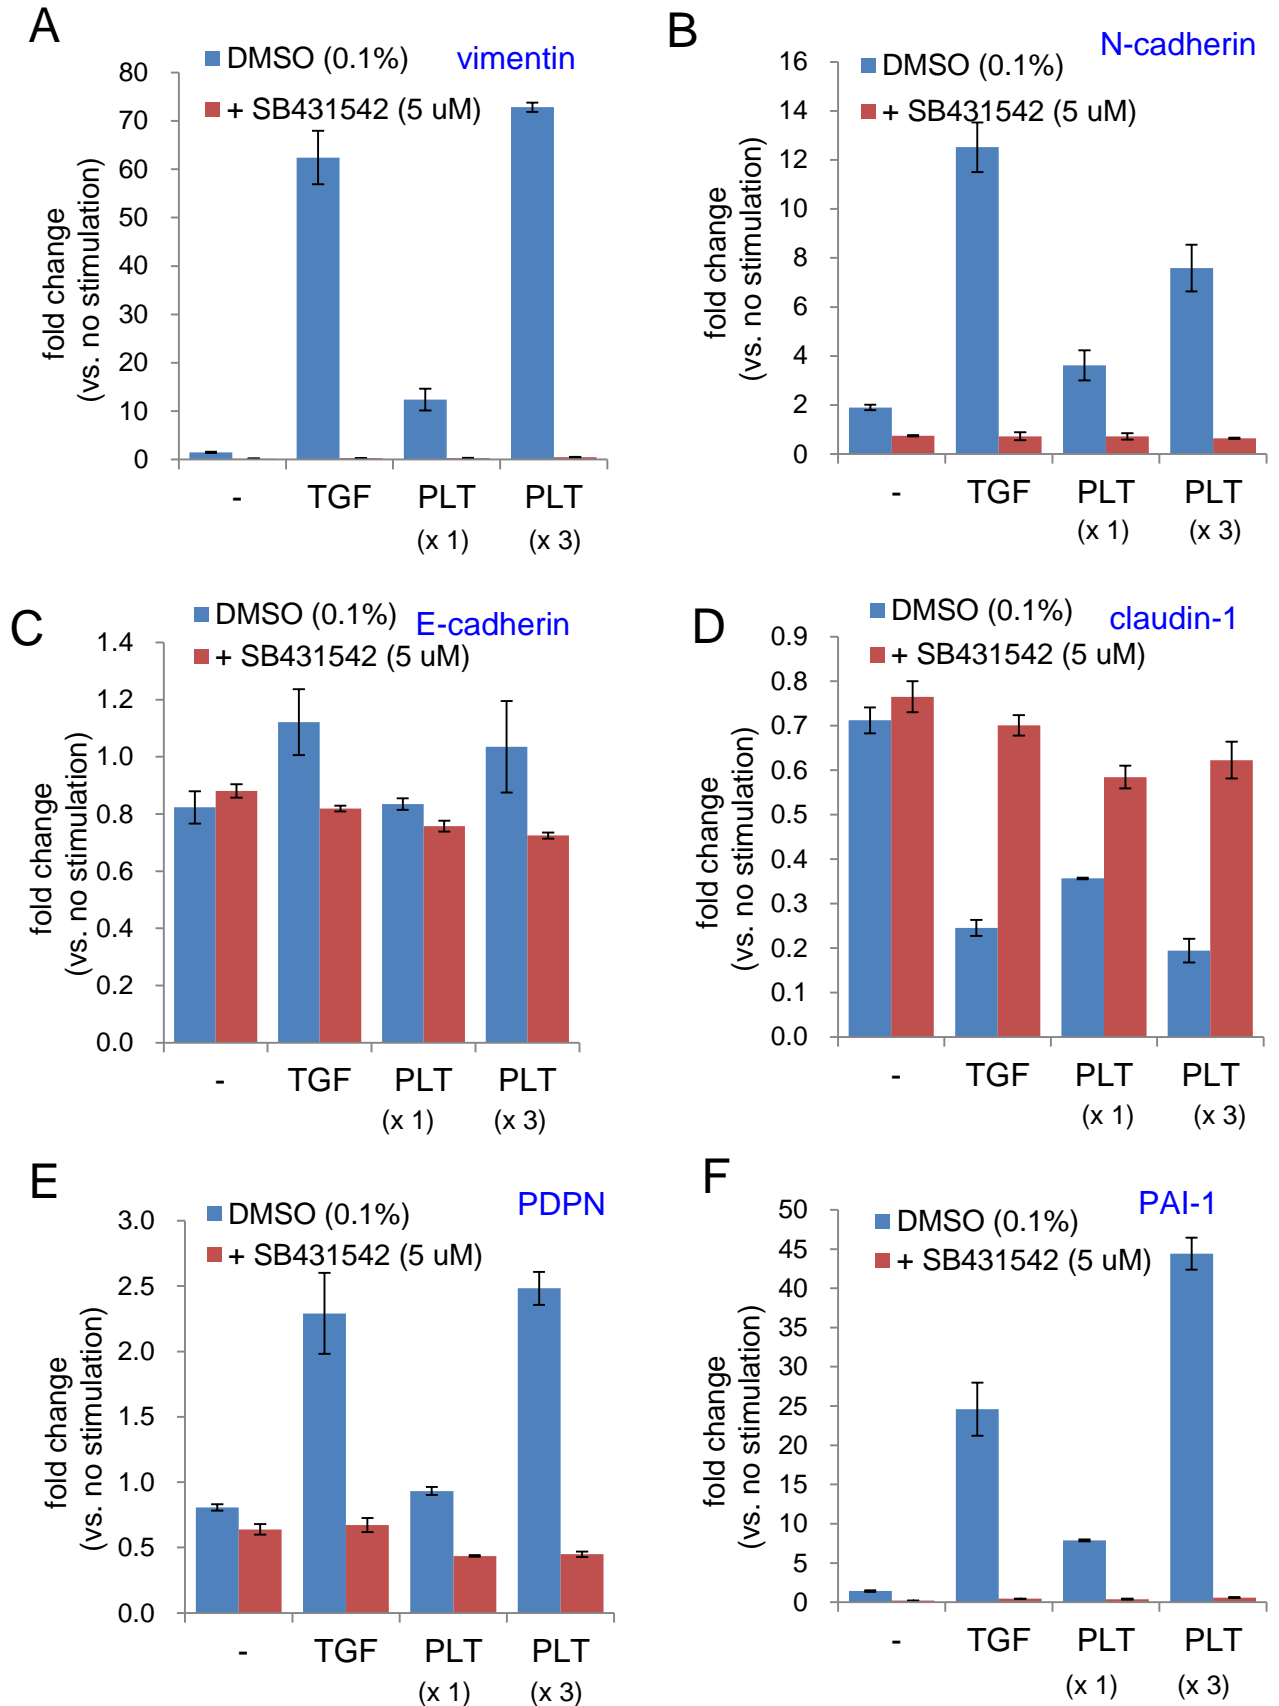

Supplemental Fig. 2

# Effect of NZ-1 on PLT-induced expression of EMT-related genes in original TE11 cell populations

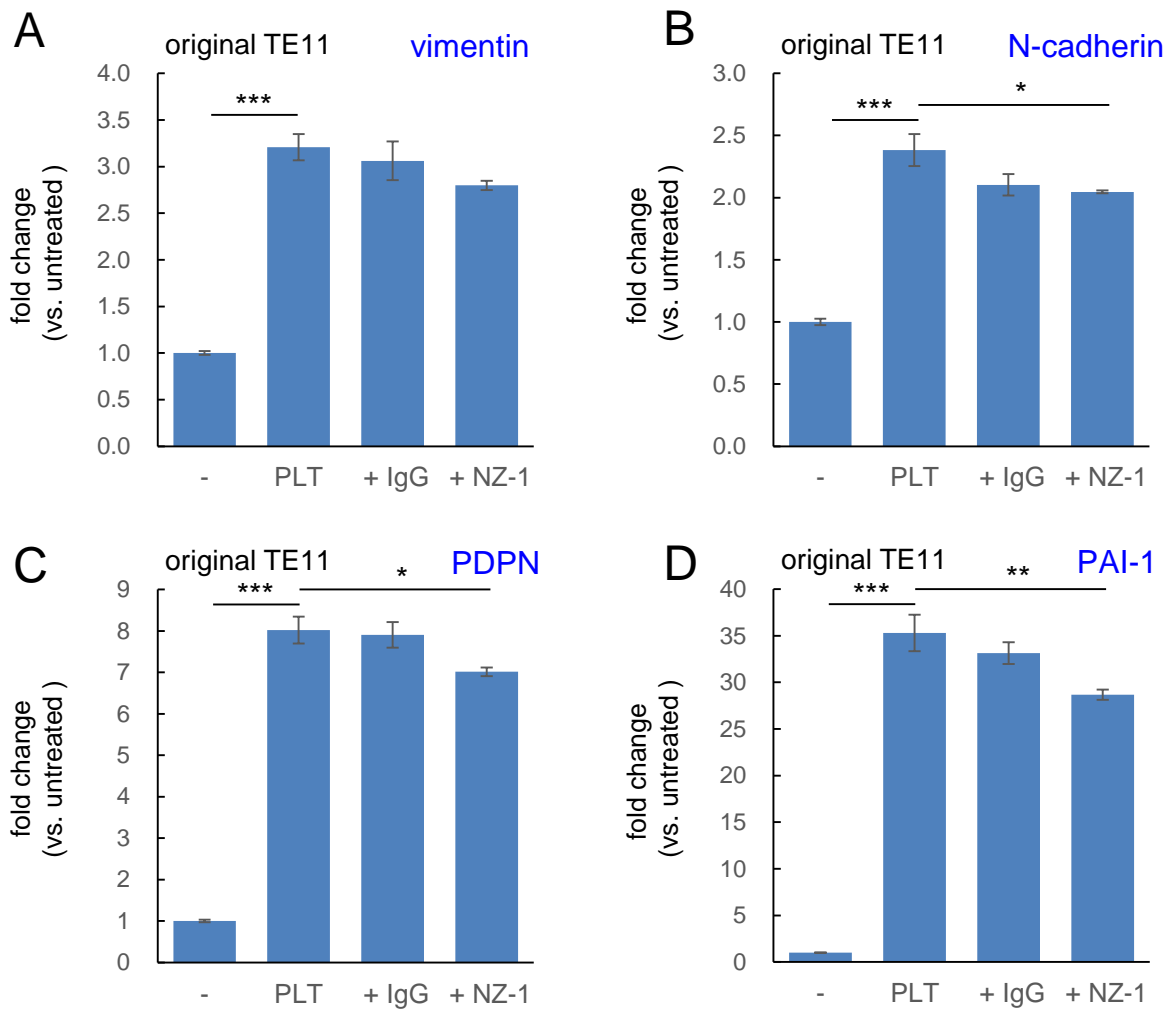

# Generation of PDPN knockout TE11A cells

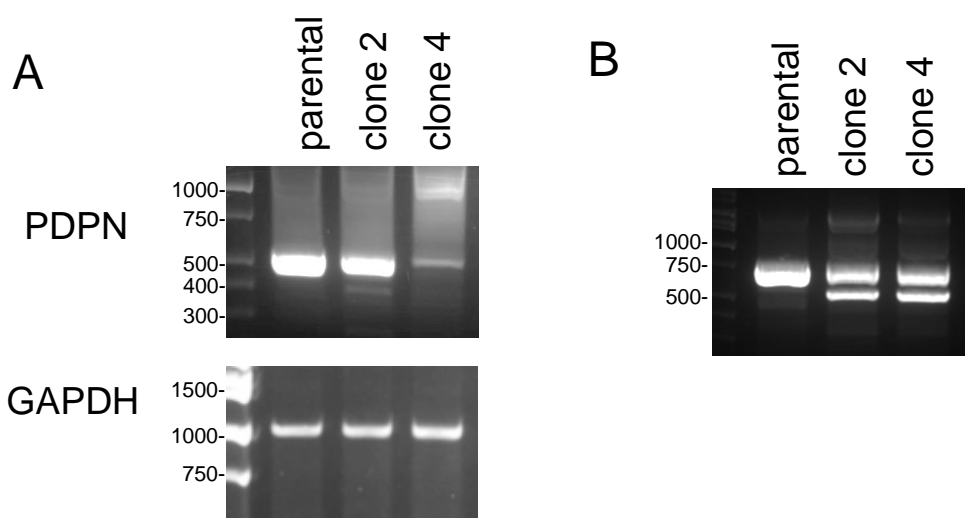

**C**

```

22621 tagacagtaa tctcaactgt aaagtaagag gtaaaacctcc atgtaatcta cgaggtctgt
22681 ggtcagagcc tgtggttcta attgtccaag tgaacagcag tcttaaaatt aaatggagag
22741 agagtttgc tttaaaaaga tggagttgg gtgtggtgt gagcactgt agtccccgct
22801 actttggaga ctgagacggg aggatcgctt gagcccagga gtttgagggt atatgagct
22861 atgattgtgc ctctgtactc tagcctcagc aacagagga gagcctgtct ctaagaaaa
22921 attaattta aaagtagag aaaaaataa aaaaaataa agatggagac cccgctttt
22981 catcgggtct gcaaaagggt gtgttagaa atctttctg ttgactctaa tttagagtt
23041 ttaggtccag atgaatatat taattcatca tatgaaatga caccaggaag aatctggtc
23101 cttattgaaa aggaaagatg tacgtcccct gtccaggcca cctcagatggg gccccagga
23161 ggggctgct gctctactt ttaatgtttt cattttcct tgctttgcaa cggagataac
23221 gagggtgttg atgtgcaga agtgcagca ggagaatggt tgggttctg gcaccacagt
23281 aagccacaaa aaggacaaa aataaaaca aaatttcaa aagaaatga aagaaaaata
23341 atccgaatgt agccgacaag ttgggtctgc ttatgcaatt tccaccttaa gctctgactc
23401 aatctttctt ctccagccag cacagccag ccactcaataa aatctgga taaggtttg
23461 gaaggcggc ttgccatgcc agtgccgaa gatgatgtg tgactccag aaccagcga
23521 gaccgctata agtctggctt gacaactctg gtcaagtgtcc tgggaagaga ggaattttt
23581 ccgtagcat gtgatcacat gcaaggctat gatgtatatt aatttacttt atataaaaat
23641 atatctatc ataaaatcag catgagccac cataccaagg alatagttacg tggctcaaca
23701 aagaagaata agtccctcact taatgttgtt gataggttct tggaaactgt gacttgaagc
23761 aaaatgactt agaaaagaacc aacattatgt gaggacctgc tgcattgtcat tttccttaaa
23821 gtcgcagttt ccaagaatct atcaacaacg ttaagtgagg agtactgtc tttcccaatt
23881 tcgtccactt agctgggtg ctgatcacag gtggtggag agtagaagcc agagcttctc
23941 aaattgtaa aaggagccag gattttacat ttccaactg ttacagccca actttcaata
24001 caatgaaagt tttctgggtt gttgtggcaa tgtcattgct ataaagggtt ctaaatatat
24061 cttctcagcc gggcgtgggt gctcacacct gtaatccag cactttggga ggctgaggca
24121 ggtgatcac ctgaggtcag gaggctcaga tcagcctgac caagatgatg aaacctgtc
24181 tctattaaaa atacaaaaat tagctggcg tggctgtgt cacctgtgat cccagctgct
24241 cgggaggctg agacaggaga atagcttga cccgggaggt ggaggttga gtgagccgag
24301 atcgcaccac tgcactccag cctgggcaac gagagtgaa ctcgcctca aaaaaataat
24361 aataaataa gtcagtcagt ctcaattgt tttctacta tagactgta ataaacagga
24421 ctagaatcag tccacagacc acagatgat agactattta gcctctgac caacacattc
24481 ctagaatcag tccacagacc acagatgat agactattta gcctctgac caacacattc
24481 ttaacctgat gaattttaat taactcctca tatgtgttac atacctacca tagacaagag
    
```

Forward 3

Forward 2

Reverse 3

Reverse 2

Reverse 1

Forward 4

Reverse 4

Effect of re-introduction of PDPN gene on the levels of E- and N-cadherin

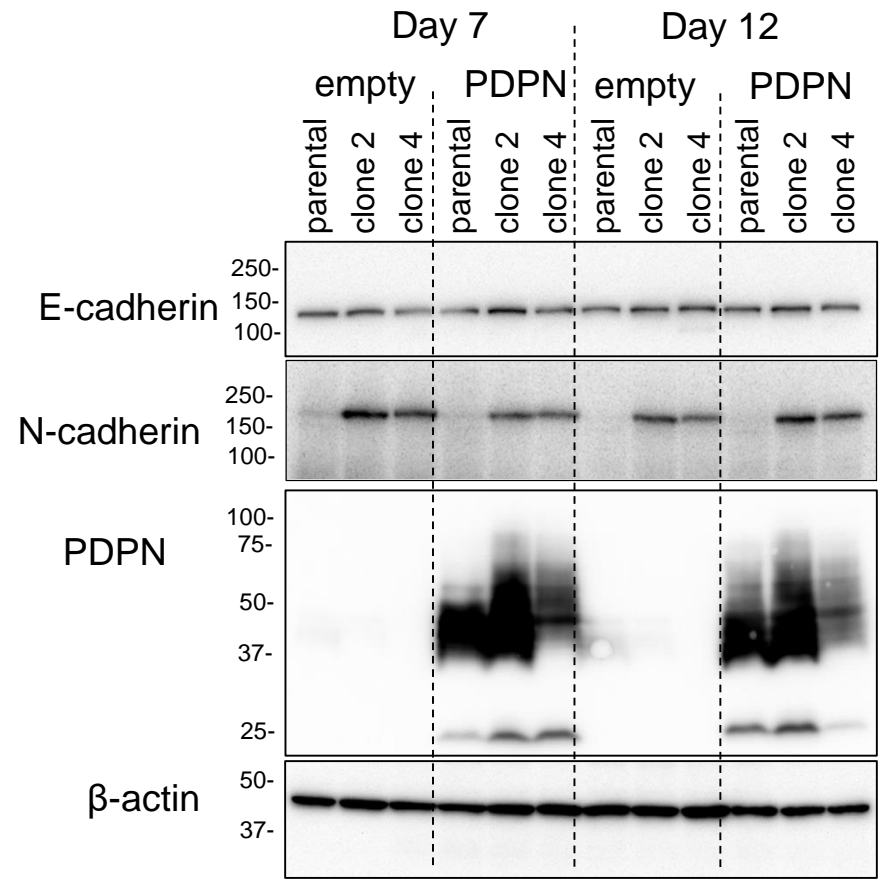

Supplement: 12935_2020_1328_MOESM1_ESM.pdf [file 12935_2020_1328_MOESM1_ESM.pdf]
